# Supplementary material for: Resistive switching non-volatile and volatile memory behavior of aromatic polyimides with various electron-withdrawing moieties
Source: Royal Society of Chemistry journal article supplement (doi:10.1039/c2jm32155f), 2012-01-01
Supplement: c2jm32155f.pdf [file c2jm32155f.pdf]

## Supporting Information

### Resistive Switching Non-Volatile and Volatile Memory Behavior of Aromatic Polyimides with Various Electron-withdrawing Moieties

By Chih-Jung Chen, Hung-Ju Yen, Wen-hang Chen and Guey-Sheng Liou\*

Functional Polymeric Materials Laboratory, Institute of Polymer Science and Engineering,  
National Taiwan University, Taipei, Taiwan

Tel: +886-2-3366-5315; Fax: +886-2-3366-5237; E-mail: [gsliou@ntu.edu.tw](mailto:gsliou@ntu.edu.tw)

#### List of Contents for Supplementary Material:

---

|                                                                                                                                                                                                                                           |              |
|-------------------------------------------------------------------------------------------------------------------------------------------------------------------------------------------------------------------------------------------|--------------|
| <b>Memory Device Characteristics of Au/DSPI/Au</b> .....                                                                                                                                                                                  | <u>SI-2</u>  |
| <b>Figure S1.</b> IR spectrum of polyimide (OMe) <sub>2</sub> TPPA-DSPI film .....                                                                                                                                                        | <u>SI-3</u>  |
| <b>Figure S2.</b> IR spectrum of polyimide (OMe) <sub>2</sub> TPPA-ODPI film .....                                                                                                                                                        | <u>SI-4</u>  |
| <b>Figure S3.</b> IR spectrum of polyimide (OMe) <sub>2</sub> TPPA-PMPI film .....                                                                                                                                                        | <u>SI-5</u>  |
| <b>Figure S4.</b> IR spectrum of polyimide (OMe) <sub>2</sub> TPPA-NPPI film .....                                                                                                                                                        | <u>SI-6</u>  |
| <b>Figure S5.</b> Current-voltage (I-V) characteristics of the ITO/DSPI (54 ± 3 nm)/Al memory device. (DSPI was prepared by thermal imidization).....                                                                                     | <u>SI-7</u>  |
| <b>Figure S6.</b> Current-voltage (I-V) characteristics of the ITO/DSPI (51 ± 2 nm)/Al memory device. (DSPI was prepared by chemical imidization, coated on ITO glass, and treated with 100°C for 1h, 200°C for 1h and 300°C for 1h)..... | <u>SI-8</u>  |
| <b>Figure S7.</b> Current-voltage (I-V) characteristics of the Au/DSPI (51 ± 2 nm)/Au memory device. ....                                                                                                                                 | <u>SI-9</u>  |
| <b>Figure S8.</b> Current-voltage (I-V) characteristics of the ITO/ODPI (50 ± 2 nm)/Al memory device. ....                                                                                                                                | <u>SI-10</u> |

**Memory Device Characteristics of Au/DSPI/Au.** Figure S7 exhibits the I-V result of Au/DSPI/Au memory device, which was measured with a compliance current of 0.01 A. During the positive and negative sweep from 0 V to 6 V or -6 V, the current increased abruptly from  $10^{-13}$  to  $10^{-3}$  A (high-conductivity state) at the threshold voltage of -4.2 V and 4 V indicating the transition from the OFF state to high-conductivity (ON) state. The device remained at the ON state during the subsequent negative scan and positive scan. Once Au/DSPI/Au memory device has been reached to the ON state, it remains there even after turning off power for 1 h or longer time. These results indicate that the Au/DSPI/Au device reveals non-volatile WORM memory behavior and could be turned on at positive and negative sweep. The lower switching-ON voltage of Au/DSPI/Au memory device could be ascribed to the lower gap between work function of Au (5.1 eV) and the HOMO of DSPI (5.06).

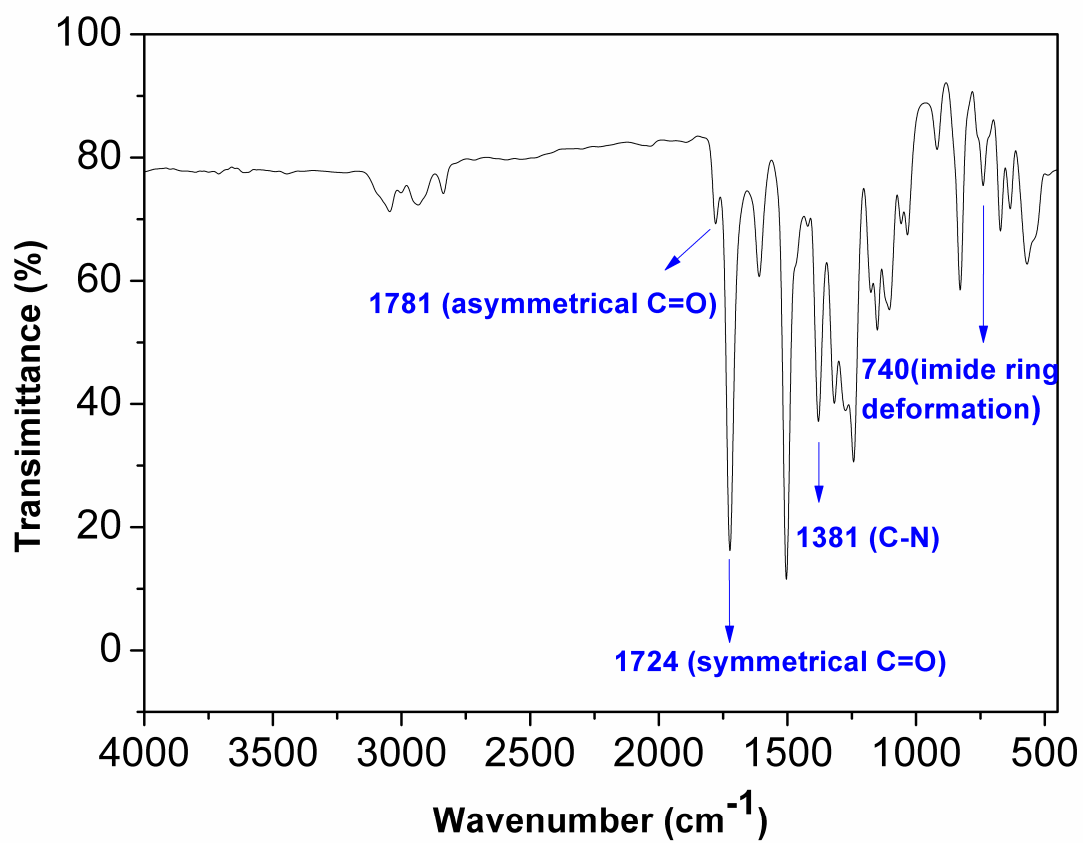

Figure S1. IR spectrum of polyimide (OMe)<sub>2</sub>TPPA-DSPI film.

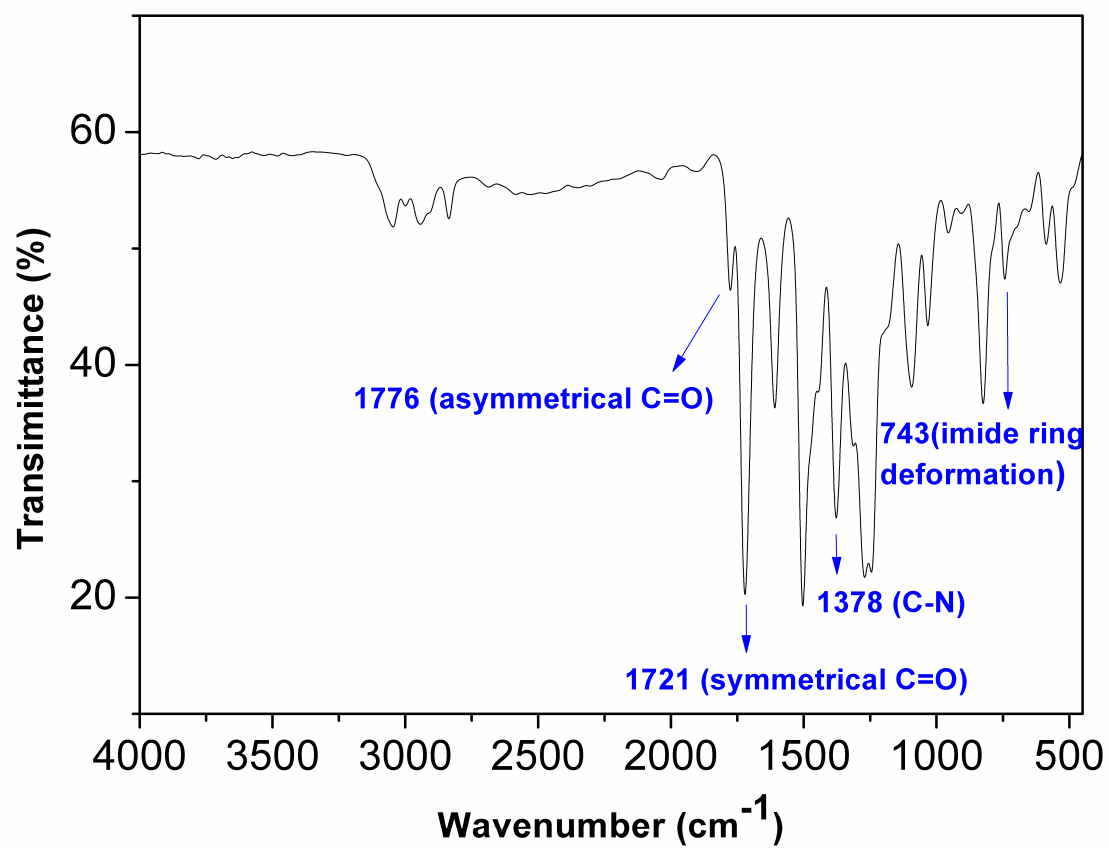

Figure S2. IR spectrum of polyimide (OMe)<sub>2</sub>TPPA-ODPI film.

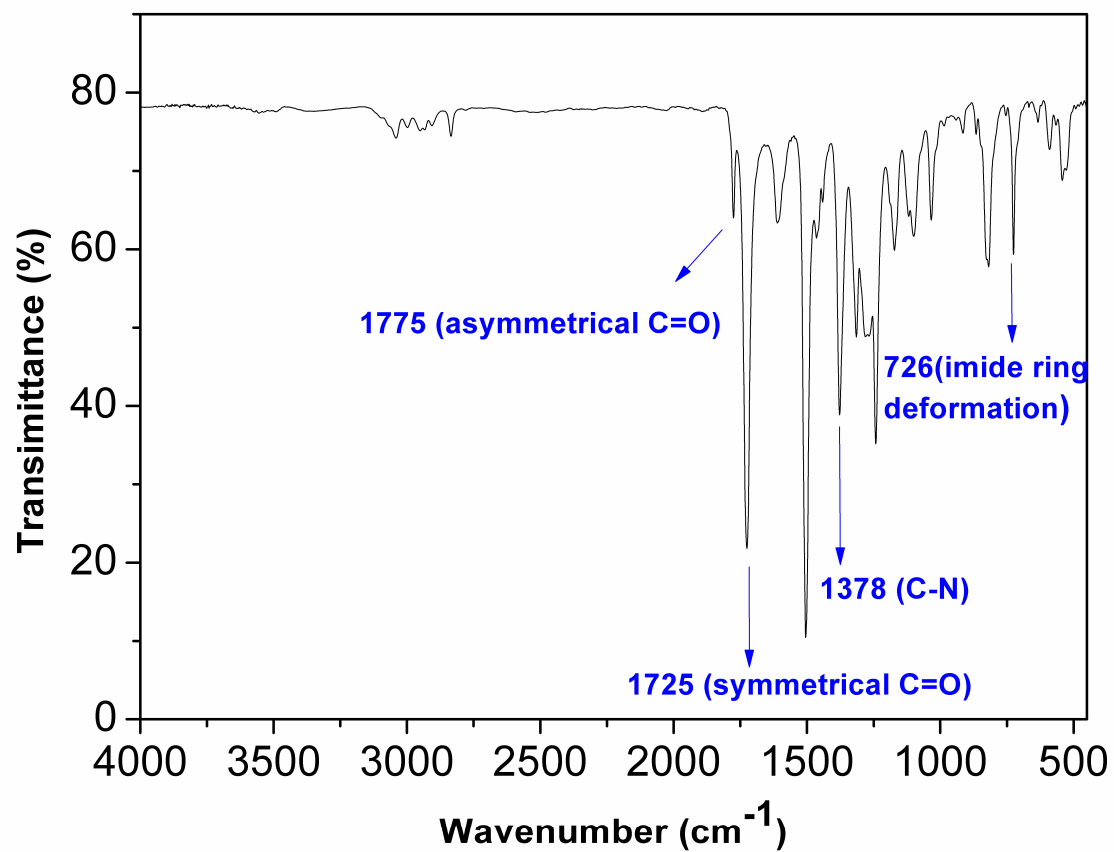

Figure S3. IR spectrum of polyimide (OMe)<sub>2</sub>TPPA-PMPI film.

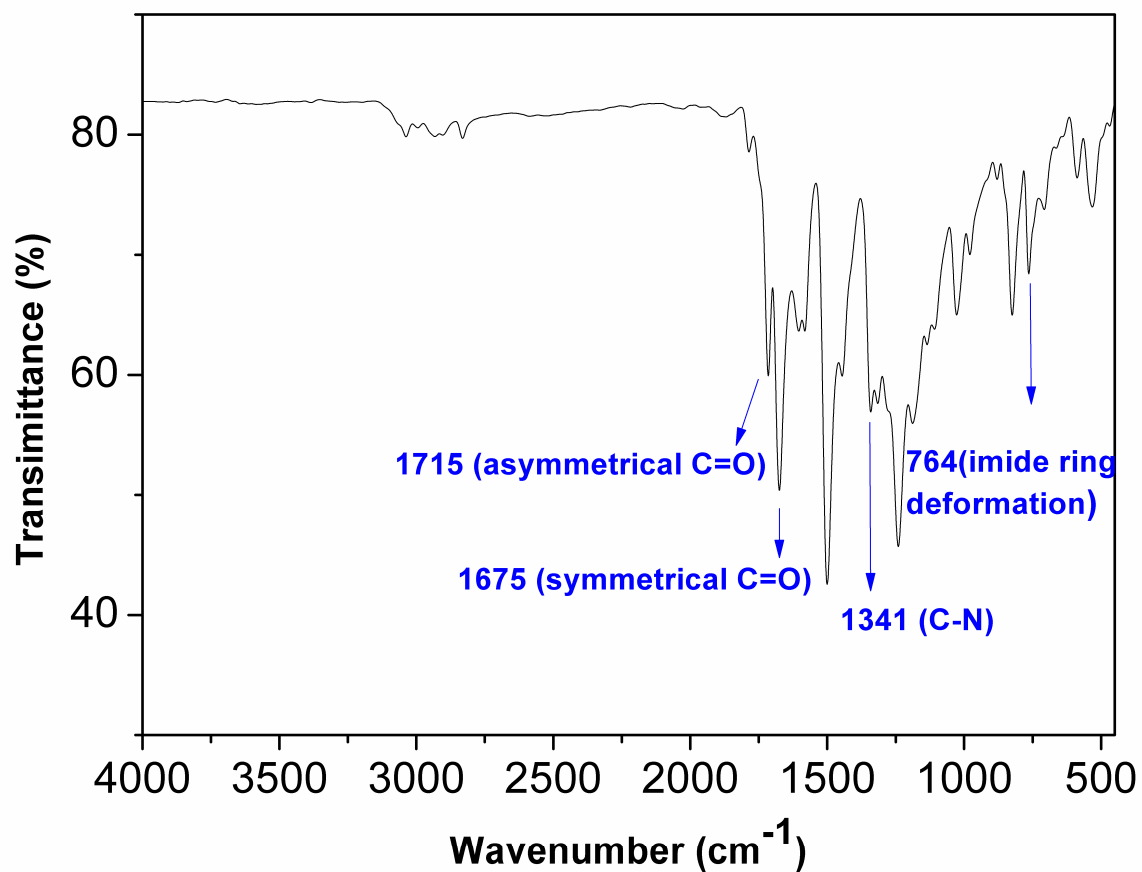

Figure S4. IR spectrum of polyimide (OMe)<sub>2</sub>TPPA-NPPI film.

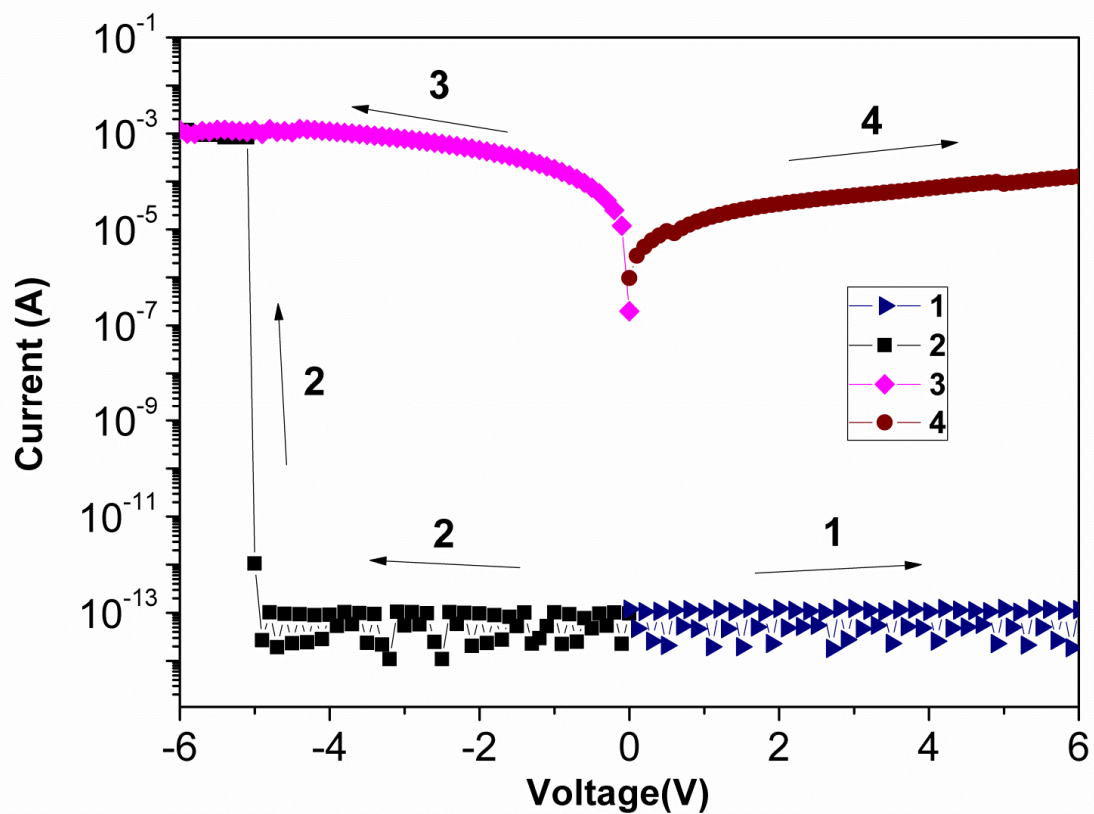

**Figure S5.** Current-voltage (I-V) characteristics of the ITO/DSPI ( $54 \pm 3$  nm)/Al memory device. (DSPI was prepared by thermal imidization)

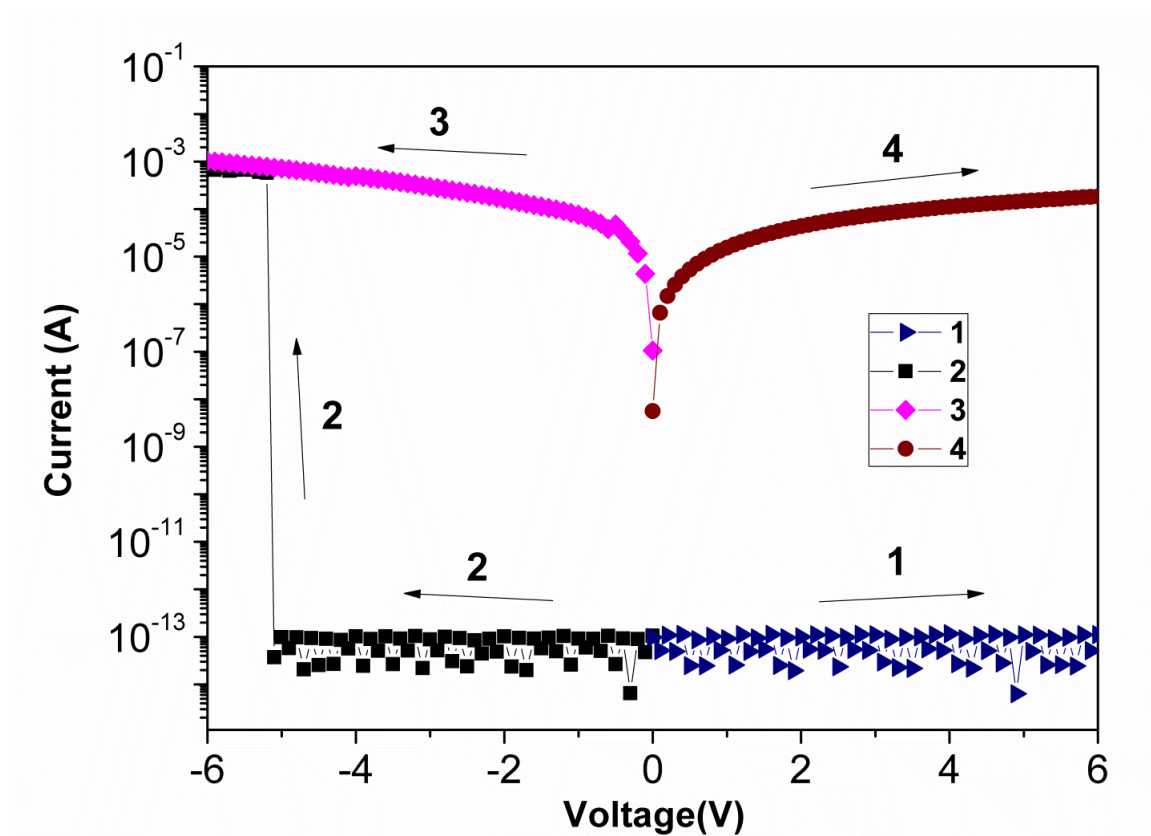

**Figure S6.** Current-voltage (I-V) characteristics of the ITO/DSPI ( $51 \pm 2$  nm)/Al memory device. (DSPI was prepared by chemical imidization, coated on ITO glass and treated at  $100^{\circ}\text{C}$  for 1h,  $200^{\circ}\text{C}$  for 1h and  $300^{\circ}\text{C}$  for 1h)



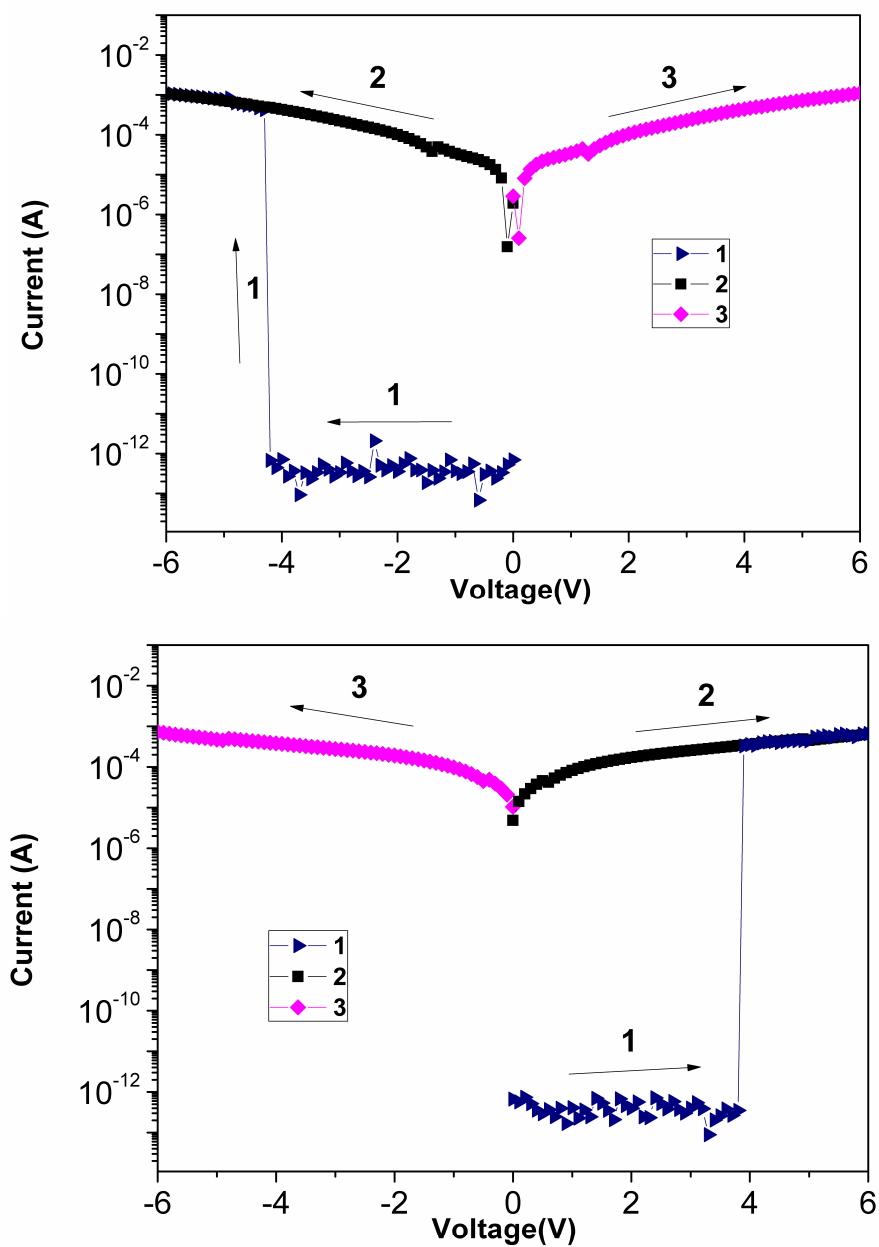

**Figure S7.** Current-voltage (I-V) characteristics of the Au/DSPI ( $51 \pm 2$  nm)/Au memory device.

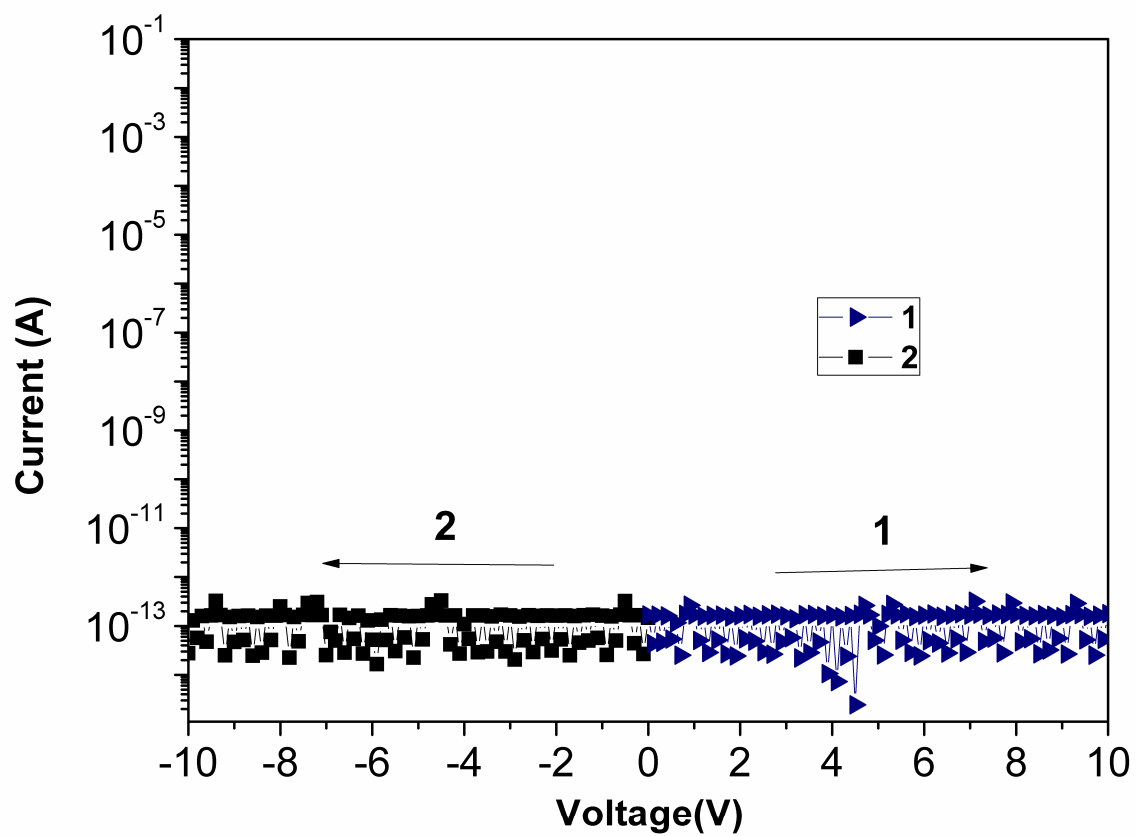

**Figure S8.** Current-voltage (I-V) characteristics of the ITO/ODPI ( $50 \pm 2$  nm)/Al memory device.
